# Supplementary material
Source: PubMed Central journal article supplement (PMC11028914)
Supplement: 262_2017_2018_MOESM1_ESM.pdf [file 262_2017_2018_MOESM1_ESM.pdf]

**Supplementary Table 1** Human leukocyte antigen (HLA-A) alleles frequency distribution in the groups

| HLA-A   | Glioma cases<br>(n=150) | Control groups |           | <i>P</i> value     |                    |
|---------|-------------------------|----------------|-----------|--------------------|--------------------|
|         |                         | A (n=150)      | B (n=618) | Case vs. control A | Case vs. control B |
| A*01:01 | 0.057                   | 0.047          | 0.034     | 0.580              | 0.067              |
| A*11:01 | 0.250                   | 0.210          | 0.202     | 0.244              | 0.069              |
| A*02:07 | 0.110                   | 0.080          | 0.077     | 0.210              | 0.062              |
| A*02:06 | 0.070                   | 0.063          | 0.047     | 0.743              | 0.105              |
| A*24:07 | 0.010                   | 0.007          | 0.005     | 0.653              | 0.295              |
| A*02:03 | 0.037                   | 0.040          | 0.024     | 0.832              | 0.232              |
| A*30:01 | 0.077                   | 0.063          | 0.050     | 0.522              | 0.072              |
| A*24:02 | 0.140                   | 0.123          | 0.105     | 0.546              | 0.086              |
| A*02:01 | 0.080                   | 0.197          | 0.158     | <0.001             | 0.001              |
| A*31:01 | 0.030                   | 0.033          | 0.019     | 0.816              | 0.215              |
| A*26:01 | 0.036                   | 0.040          | 0.027     | 0.832              | 0.353              |
| A*33:03 | 0.090                   | 0.087          | 0.062     | 0.886              | 0.087              |
| A*29:01 | 0.013                   | 0.010          | 0.007     | 0.704              | 0.305              |

**Supplementary Table 2** Human leukocyte antigen (HLA-B) alleles frequency distribution in the groups

| HLA-B   | Glioma cases<br>(n=150) | Control groups |           | <i>P</i> value     |                    |
|---------|-------------------------|----------------|-----------|--------------------|--------------------|
|         |                         | A (n=150)      | B (n=618) | Case vs. control A | Case vs. control B |
| B*37:01 | 0.020                   | 0.017          | 0.009     | 0.761              | 0.099              |
| B*35:01 | 0.047                   | 0.050          | 0.030     | 0.849              | 0.147              |
| B*13:01 | 0.057                   | 0.050          | 0.036     | 0.716              | 0.094              |
| B*40:01 | 0.110                   | 0.113          | 0.081     | 0.897              | 0.108              |
| B*07:02 | 0.027                   | 0.030          | 0.034     | 0.806              | 0.522              |
| B*46:01 | 0.110                   | 0.127          | 0.096     | 0.527              | 0.475              |
| B*15:11 | 0.027                   | 0.020          | 0.017     | 0.589              | 0.269              |
| B*13:02 | 0.057                   | 0.080          | 0.055     | 0.257              | 0.911              |
| B*40:06 | 0.050                   | 0.040          | 0.032     | 0.555              | 0.140              |
| B*48:01 | 0.037                   | 0.023          | 0.020     | 0.338              | 0.091              |
| B*15:01 | 0.100                   | 0.093          | 0.070     | 0.782              | 0.083              |
| B*07:05 | 0.010                   | 0.007          | 0.004     | 0.653              | 0.199              |
| B*40:03 | 0.007                   | 0.010          | 0.0024    | 0.653              | 0.248              |
| B*57:01 | 0.020                   | 0.023          | 0.010     | 0.779              | 0.137              |
| B*51:02 | 0.010                   | 0.013          | 0.005     | 0.704              | 0.295              |
| B*52:01 | 0.030                   | 0.033          | 0.017     | 0.816              | 0.144              |
| B*51:01 | 0.080                   | 0.083          | 0.054     | 0.881              | 0.090              |
| B*44:03 | 0.043                   | 0.047          | 0.026     | 0.844              | 0.108              |
| B*38:02 | 0.037                   | 0.033          | 0.019     | 0.824              | 0.072              |
| B*54:01 | 0.050                   | 0.047          | 0.030     | 0.849              | 0.085              |
| B*08:01 | 0.017                   | 0.013          | 0.007     | 0.737              | 0.125              |
| B*15:18 | 0.023                   | 0.020          | 0.011     | 0.779              | 0.108              |
| B*15:13 | 0.003                   | 0.000          | 0.001     | 0.317              | 0.277              |
| B*15:17 | 0.007                   | 0.010          | 0.002     | 0.653              | 0.248              |
| B*40:02 | 0.023                   | 0.020          | 0.011     | 0.779              | 0.108              |

**Supplementary Table 3** Human leukocyte antigen (HLA-C) alleles frequency distribution in the groups

| HLA-C       | Glioma cases<br>(n=150) | Control groups |           | <i>P</i> value     |                    |
|-------------|-------------------------|----------------|-----------|--------------------|--------------------|
|             |                         | A (n=150)      | B (n=567) | Case vs. control A | Case vs. control B |
| C*03:04     | 0.110                   | 0.090          | 0.088     | 0.414              | 0.128              |
| C*03:03     | 0.057                   | 0.040          | 0.038     | 0.341              | 0.149              |
| C*06:02     | 0.150                   | 0.123          | 0.116     | 0.342              | 0.106              |
| C*01:02     | 0.137                   | 0.120          | 0.104     | 0.542              | 0.110              |
| C*04:01     | 0.057                   | 0.063          | 0.067     | 0.731              | 0.517              |
| C*08:03     | 0.023                   | 0.020          | 0.012     | 0.779              | 0.119              |
| C*07:02     | 0.090                   | 0.123          | 0.124     | 0.186              | 0.100              |
| C*15:02     | 0.057                   | 0.050          | 0.040     | 0.716              | 0.198              |
| C*12:02     | 0.027                   | 0.020          | 0.032     | 0.589              | 0.650              |
| C*14:02     | 0.027                   | 0.043          | 0.047     | 0.267              | 0.126              |
| C*14:03     | 0.027                   | 0.020          | 0.021     | 0.589              | 0.566              |
| C*08:01:01G | 0.077                   | 0.120          | 0.090     | 0.075              | 0.468              |
| C*15:05     | 0.007                   | 0.010          | 0.010     | 0.653              | 0.622              |
| C*07:04     | 0.017                   | 0.010          | 0.011     | 0.477              | 0.387              |
| C*08:01     | 0.110                   | 0.113          | 0.089     | 0.897              | 0.268              |
| C*07:01:01G | 0.027                   | 0.037          | 0.029     | 0.484              | 0.822              |

**Supplementary Table 4** Human leukocyte antigen (HLA-DPB1) alleles frequency distribution in the groups

| HLA-DPB1   | Glioma cases<br>(n=150) | Control groups |           | <i>P</i> value     |                    |
|------------|-------------------------|----------------|-----------|--------------------|--------------------|
|            |                         | A (n=150)      | B (n=171) | Case vs. control A | Case vs. control B |
| DPB1*04:02 | 0.057                   | 0.050          | 0.053     | 0.716              | 0.822              |
| DPB1*05:01 | 0.357                   | 0.397          | 0.378     | 0.312              | 0.590              |
| DPB1*02:02 | 0.070                   | 0.063          | 0.061     | 0.743              | 0.660              |
| DPB1*03:01 | 0.057                   | 0.047          | 0.039     | 0.580              | 0.264              |
| DPB1*02:01 | 0.263                   | 0.213          | 0.231     | 0.151              | 0.343              |
| DPB1*04:01 | 0.100                   | 0.127          | 0.114     | 0.303              | 0.567              |
| DPB1*13:01 | 0.030                   | 0.037          | 0.025     | 0.649              | 0.778              |
| DPB1*14:01 | 0.040                   | 0.033          | 0.031     | 0.664              | 0.594              |
| DPB1*17:01 | 0.027                   | 0.033          | 0.036     | 0.632              | 0.540              |

**Supplementary Table 5** Human leukocyte antigen (HLA-DQB1) alleles frequency distribution in the groups

| HLA-DQB1   | Glioma cases<br>(n=150) | Control groups |           | <i>P</i> value     |                    |
|------------|-------------------------|----------------|-----------|--------------------|--------------------|
|            |                         | A (n=150)      | B (n=618) | Case vs. control A | Case vs. control B |
| DQB1*05:03 | 0.057                   | 0.063          | 0.053     | 0.731              | 0.822              |
| DQB1*02:01 | 0.130                   | 0.147          | 0.126     | 0.554              | 0.872              |
| DQB1*06:01 | 0.083                   | 0.063          | 0.105     | 0.347              | 0.344              |
| DQB1*03:01 | 0.220                   | 0.230          | 0.205     | 0.769              | 0.635              |
| DQB1*05:01 | 0.057                   | 0.080          | 0.058     | 0.257              | 0.922              |
| DQB1*04:01 | 0.070                   | 0.050          | 0.047     | 0.302              | 0.208              |
| DQB1*03:02 | 0.080                   | 0.070          | 0.061     | 0.642              | 0.357              |
| DQB1*06:02 | 0.140                   | 0.120          | 0.102     | 0.466              | 0.143              |
| DQB1*05:02 | 0.027                   | 0.033          | 0.029     | 0.632              | 0.844              |
| DQB1*06:04 | 0.007                   | 0.003          | 0.006     | 0.563              | 0.895              |
| DQB1*03:03 | 0.130                   | 0.140          | 0.164     | 0.720              | 0.230              |

**Supplementary Table 6** Human leukocyte antigen (HLA-DRB1) alleles frequency distribution in the groups

| HLA-DRB1       | Glioma cases<br>(n=150) | Control groups |           | <i>P</i> value     |                    |
|----------------|-------------------------|----------------|-----------|--------------------|--------------------|
|                |                         | A (n=150)      | B (n=567) | Case vs. control A | Case vs. control B |
| DRB1*14:05     | 0.027                   | 0.020          | 0.018     | 0.589              | 0.319              |
| DRB1*03:01     | 0.027                   | 0.033          | 0.035     | 0.632              | 0.481              |
| DRB1*07:01     | 0.127                   | 0.120          | 0.095     | 0.804              | 0.099              |
| DRB1*08:03     | 0.060                   | 0.050          | 0.041     | 0.591              | 0.160              |
| DRB1*08:02     | 0.010                   | 0.010          | 0.007     | 1.000              | 0.631              |
| DRB1*10:01     | 0.017                   | 0.010          | 0.009     | 0.477              | 0.235              |
| DRB1*12:02     | 0.073                   | 0.040          | 0.059     | 0.077              | 0.357              |
| DRB1*04:05     | 0.063                   | 0.050          | 0.041     | 0.480              | 0.100              |
| DRB1*04:06     | 0.023                   | 0.020          | 0.014     | 0.779              | 0.230              |
| DRB1*11:01:01G | 0.057                   | 0.073          | 0.056     | 0.408              | 0.955              |
| DRB1*09:01     | 0.187                   | 0.180          | 0.153     | 0.833              | 0.152              |
| DRB1*15:01     | 0.100                   | 0.090          | 0.076     | 0.676              | 0.172              |
| DRB1*14:01:01G | 0.057                   | 0.050          | 0.043     | 0.716              | 0.304              |
| DRB1*13:02     | 0.033                   | 0.050          | 0.023     | 0.307              | 0.285              |
| DRB1*15:02     | 0.027                   | 0.033          | 0.023     | 0.632              | 0.680              |
| DRB1*12:01     | 0.057                   | 0.080          | 0.056     | 0.257              | 0.955              |
| DRB1*12:01:01G | 0.053                   | 0.090          | 0.074     | 0.082              | 0.216              |
| DRB1*15:03     | 0.003                   | 0.003          | 0.001     | 1.000              | 0.277              |
